# Supplementary material for: Enhancement of the spin polarization of an Fe3O4(100) surface by nitric oxide adsorption
Source: Royal Society of Chemistry journal article supplement (doi:10.1039/c8cp02361a), 2018-01-01
Supplement: c8cp02361a1.pdf [file c8cp02361a1.pdf]

## Supplementary Material

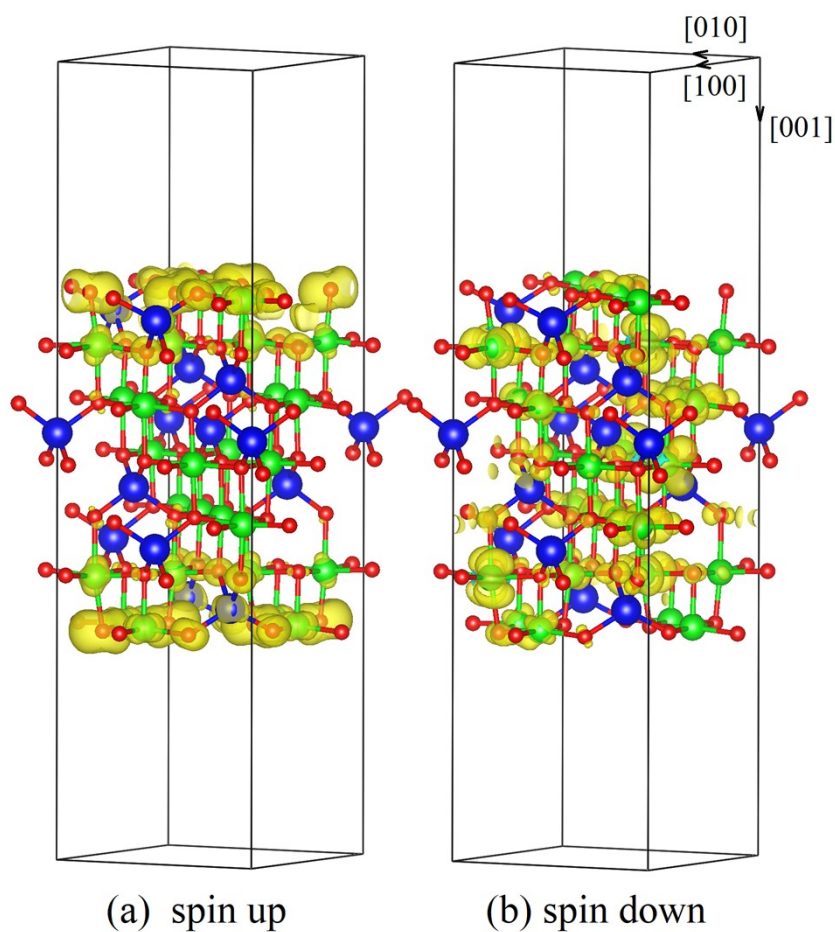

The charge density map of the eight bands just below the Fermi level for a clean  $\text{Fe}_3\text{O}_4(100)$  surface calculated using GGA+U for (a) spin-up and (b) spin-down. The spin-up charge density is dominated by contributions from surface Fe(B), O1 and O2 atoms. The spin-down charge density is mainly contributed to by Fe(B) atoms at deeper layers and only slightly by surface Fe(B) atoms. The isosurface is plotted with  $0.002 \text{ e}/\text{\AA}^3$ .
